# Supplementary material
Source: MDPI journal article supplement (https://www.mdpi.com/2075-163X/11/9/1018)
Supplement: s1 [file s1]

# Supplementary Materials

**Table S1.** Modal composition of the studied samples.

| Sample                       | Modal composition (%) |           |                  |          |        |         |
|------------------------------|-----------------------|-----------|------------------|----------|--------|---------|
|                              | olivine               | tremolite | opx <sup>1</sup> | chlorite | spinel | biotite |
| 443<br>Trm-rich <sup>2</sup> | 46                    | 42        | 12               | 0        | 0      | 0       |
| 447                          | 96                    | 1         | 1                | 1        | 0.5    | 0.5     |
| 448                          | 96                    | 1         | 2                | 1        | 0.5    | 0.5     |

<sup>1</sup>Orthopyroxene; <sup>2</sup>Tremolite-rich layer

**Table S2.** Olivine slip system determined by EBSD mapping along olivine subgrain boundaries.

| Slip System | Sample 447 | Sample 448 |
|-------------|------------|------------|
| (001)[100]  | 15         | 15         |
| (010)[100]  | 1          | 4          |
| (0kl)[100]  | 2          | 1          |
| (100)[001]  | 1          | -          |
| (010)[001]  | 1          | -          |

**Table S3.** Summary of olivine slip systems determined from the thickness fringe method in Figures 6, 7 and 8.

| Sample                      | Figure Number | $g^1$             | $n^2$ | $b^3$ | Line Direction | Slip System |
|-----------------------------|---------------|-------------------|-------|-------|----------------|-------------|
| 447<br>dislocation 1        | Fig. 6A       | 211               | +2    | [100] | [001]          | (010)[100]  |
|                             | Fig. 6B       | 122               | +1    |       |                |             |
|                             | Fig. 6C       | 112               | +1    |       |                |             |
| 447<br>dislocation 2        | Fig. 6D       | 211               | -1    | [001] | [100]          | (010)[001]  |
|                             | Fig. 6E       | 122               | -2    |       |                |             |
|                             | Fig. 6F       | 112               | -2    |       |                |             |
| 447<br>dislocation 3        | Fig. 6G       | $0\bar{4}1$       | 0     | [100] | [010]          | (001)[100]  |
|                             | Fig. 6H       | $1\bar{3}0$       | +1    |       |                |             |
|                             | Fig. 6I       | $2\bar{4}0$       | +2    |       |                |             |
| 448<br>dislocation 1        | Fig. 7A       | 131               | +1    | [100] | [001]          | (010)[100]  |
|                             | Fig. 7B       | 004               | 0     |       |                |             |
|                             | Fig. 7C       | 140               | +1    |       |                |             |
| 448<br>dislocation 2        | Fig. 7D       | 131               | -1    | [001] | [100]          | (010)[001]  |
|                             | Fig. 7E       | 004               | -4    |       |                |             |
|                             | Fig. 7F       | 140               | 0     |       |                |             |
| 448<br>dislocation 3        | Fig. 7G       | $\bar{1}30$       | -1    | [100] | [010]          | (001)[100]  |
|                             | Fig. 7H       | 041               | 0     |       |                |             |
|                             | Fig. 7I       | $\bar{2}1\bar{1}$ | -2    |       |                |             |
| 448<br>subgrain<br>boundary | Fig. 8A       | $\bar{1}30$       | +1    | [100] | [010]          | (001)[100]  |
|                             | Fig. 8B       | 041               | 0     |       |                |             |
|                             | Fig. 8C       | $\bar{2}1\bar{1}$ | +2    |       |                |             |

<sup>1</sup> Diffraction vector; <sup>2</sup> Number of terminating thickness fringes at the extremity of dislocation; <sup>3</sup> Burgers vector

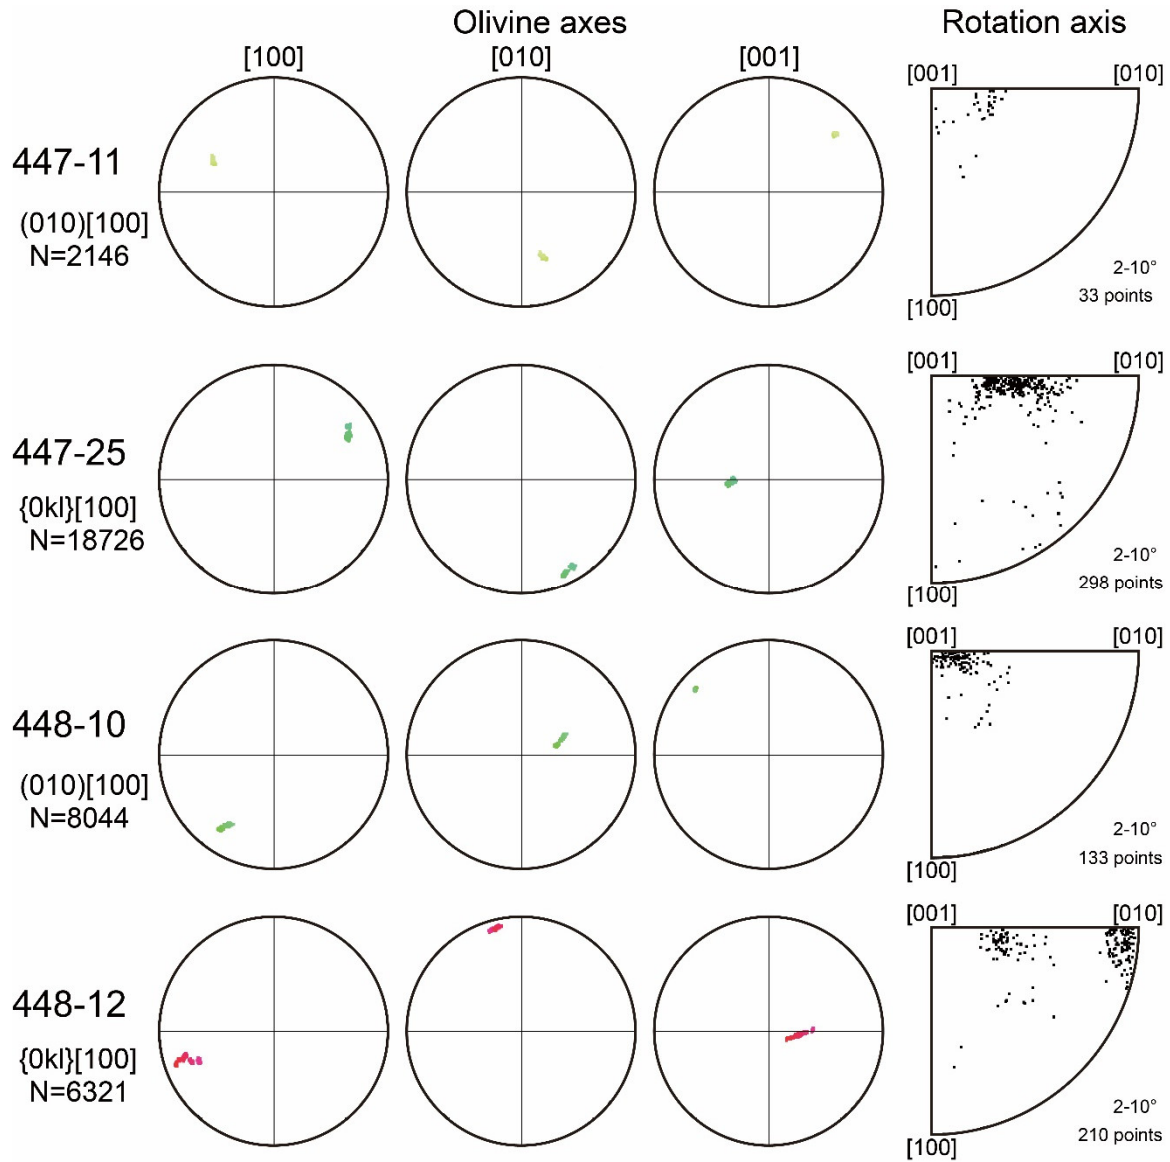

**Figure S1.** The examples of minor slip systems of the olivine determined from the subgrain boundaries in olivines of samples 447 and 448. The [100], [010], and [001] olivine crystallographic axes are plotted in the lower hemisphere of stereonet. The rotational axis distribution with misorientation angles of 2-10° is plotted in the inverse pole figure. N is the number of data points for each EBSD mapping.
